# Supplementary material for: Cross-Sectional Analysis of the Association between Periodontitis and Cardiovascular Disease Using the Korean Genome and Epidemiology Study Data
Source: PubMed Central journal article supplement (PMC7400444; doi:10.3390/ijerph17145237), 2020-07-20
Supplement: ijerph-17-05237-s001.pdf [file ijerph-17-05237-s001.pdf]

# Supplementary Materials

**Table S1.** Subgroup analyses of crude and adjusted odd ratios (95% confidence interval) for stroke in periodontitis and control groups according to smoking, alcohol consumption, and history of diabetes, hypertension, and dyslipidemia.

| Characteristics                        | Odd Ratios for Stroke |                 |                  |                 |
|----------------------------------------|-----------------------|-----------------|------------------|-----------------|
|                                        | Crude                 | <i>p</i> -Value | Adjusted †       | <i>p</i> -Value |
| Smoking                                |                       |                 |                  |                 |
| Nonsmoker ( <i>n</i> = 97,797)         |                       |                 |                  |                 |
| Periodontitis                          | 1.73 (1.42–2.11)      | <0.001 *        | 1.40 (1.15–1.71) | 0.001 *         |
| Control                                | 1.00                  |                 | 1.00             |                 |
| Past smoker ( <i>n</i> = 20,386)       |                       |                 |                  |                 |
| Periodontitis                          | 1.55 (1.19–2.03)      | 0.001 *         | 1.33 (1.01–1.74) | 0.042 *         |
| Control                                | 1.00                  |                 | 1.00             |                 |
| Current smoker ( <i>n</i> = 17,094)    |                       |                 |                  |                 |
| Periodontitis                          | 1.64 (1.10–2.45)      | 0.016 *         | 1.23 (0.82–1.86) | 0.320           |
| Control                                | 1.00                  |                 | 1.00             |                 |
| Alcohol consumption                    |                       |                 |                  |                 |
| Nondrinker ( <i>n</i> = 68,811)        |                       |                 |                  |                 |
| Periodontitis                          | 1.54 (1.23–1.93)      | <0.001 *        | 1.25 (1.00–1.57) | 0.056           |
| Control                                | 1.00                  |                 | 1.00             |                 |
| Past drinker ( <i>n</i> = 5015)        |                       |                 |                  |                 |
| Periodontitis                          | 1.77 (1.21–2.58)      | 0.003 *         | 1.55 (1.04–2.29) | 0.030 *         |
| Control                                | 1.00                  |                 | 1.00             |                 |
| Current drinker ( <i>n</i> = 61,451)   |                       |                 |                  |                 |
| Periodontitis                          | 1.82 (1.45–2.28)      | <0.001 *        | 1.43 (1.14–1.80) | 0.002 *         |
| Control                                | 1.00                  |                 | 1.00             |                 |
| History of diabetes                    |                       |                 |                  |                 |
| Non-diabetes ( <i>n</i> = 124,289)     |                       |                 |                  |                 |
| Periodontitis                          | 1.66 (1.40–1.97)      | <0.001 *        | 1.35 (1.14–1.61) | 0.001 *         |
| Control                                | 1.00                  |                 | 1.00             |                 |
| Diabetes ( <i>n</i> = 10,988)          |                       |                 |                  |                 |
| Periodontitis                          | 1.48 (1.10–1.98)      | 0.009 *         | 1.39 (1.03–1.88) | 0.029 *         |
| Control                                | 1.00                  |                 | 1.00             |                 |
| History of hypertension                |                       |                 |                  |                 |
| Non-hypertension ( <i>n</i> = 104,438) |                       |                 |                  |                 |
| Periodontitis                          | 1.64 (1.29–2.07)      | <0.001 *        | 1.34 (1.05–1.70) | 0.018 *         |
| Control                                | 1.00                  |                 | 1.00             |                 |
| Hypertension ( <i>n</i> = 30,839)      |                       |                 |                  |                 |
| Periodontitis                          | 1.52 (1.25–1.83)      | <0.001 *        | 1.38 (1.14–1.67) | 0.001 *         |
| Control                                | 1.00                  |                 | 1.00             |                 |

|                                        |                  |          |                  |          |
|----------------------------------------|------------------|----------|------------------|----------|
| History of dyslipidemia                |                  |          |                  |          |
| Non-dyslipidemia ( <i>n</i> = 115,588) |                  |          |                  |          |
| Periodontitis                          | 1.69 (1.42–2.02) | <0.001 * | 1.40 (1.17–1.68) | <0.001 * |
| Control                                | 1.00             |          | 1.00             |          |
| Dyslipidemia ( <i>n</i> = 19,689)      |                  |          |                  |          |
| Periodontitis                          | 1.45 (1.12–1.89) | 0.005 *  | 1.28 (0.98–1.67) | 0.071    |
| Control                                | 1.00             |          | 1.00             |          |

\* Logistic regression model, Significance at  $p < 0.05$ . † Adjusted for age, sex, income group, BMI, smoking, alcohol consumption, hypertension, diabetes mellitus, hyperlipidemia histories, and nutritional intake (total calories, protein, fat, and carbohydrate intake).

**Table 2.** Subgroup analyses of crude and adjusted odd ratios (95% confidence interval) for ischemic heart disease in periodontitis and control groups according to smoking, alcohol consumption, and history of diabetes, hypertension, and dyslipidemia.

| Characteristics                        | Odd Ratios for Ischemic Heart Disease |                 |                    |                 |
|----------------------------------------|---------------------------------------|-----------------|--------------------|-----------------|
|                                        | Crude                                 | <i>p</i> -Value | Adjusted †         | <i>p</i> -Value |
| Smoking                                |                                       |                 |                    |                 |
| Nonsmoker ( <i>n</i> = 97,797)         |                                       |                 |                    |                 |
| Periodontitis                          | 1.69 (1.48 - 1.91)                    | <0.001*         | 1.37 (1.20 - 1.56) | <0.001 *        |
| Control                                | 1.00                                  |                 | 1.00               |                 |
| Past smoker ( <i>n</i> = 20,386)       |                                       |                 |                    |                 |
| Periodontitis                          | 1.52 (1.27 - 1.83)                    | <0.001*         | 1.30 (1.08 - 1.57) | 0.006 *         |
| Control                                | 1.00                                  |                 | 1.00               |                 |
| Current smoker ( <i>n</i> = 17,094)    |                                       |                 |                    |                 |
| Periodontitis                          | 1.66 (1.29 - 2.13)                    | <0.001 *        | 1.35 (1.04 - 1.74) | 0.024 *         |
| Control                                | 1.00                                  |                 | 1.00               |                 |
| Alcohol consumption                    |                                       |                 |                    |                 |
| Nondrinker ( <i>n</i> = 68,811)        |                                       |                 |                    |                 |
| Periodontitis                          | 1.71 (1.49 - 1.96)                    | <0.001 *        | 1.40 (1.22 - 1.61) | <0.001 *        |
| Control                                | 1.00                                  |                 | 1.00               |                 |
| Past drinker ( <i>n</i> = 5015)        |                                       |                 |                    |                 |
| Periodontitis                          | 1.38 (0.99 - 1.93)                    | 0.058           | 1.20 (0.85 - 1.70) | 0.292           |
| Control                                | 1.00                                  |                 | 1.00               |                 |
| Current drinker ( <i>n</i> = 61,451)   |                                       |                 |                    |                 |
| Periodontitis                          | 1.69 (1.46 - 1.96)                    | <0.001 *        | 1.33 (1.14 - 1.55) | <0.001 *        |
| Control                                | 1.00                                  |                 | 1.00               |                 |
| History of diabetes                    |                                       |                 |                    |                 |
| Non-diabetes ( <i>n</i> = 124,289)     |                                       |                 |                    |                 |
| Periodontitis                          | 1.65 (1.47 - 1.84)                    | <0.001 *        | 1.36 (1.21 - 1.52) | <0.001 *        |
| Control                                | 1.00                                  |                 | 1.00               |                 |
| Diabetes ( <i>n</i> = 10,988)          |                                       |                 |                    |                 |
| Periodontitis                          | 1.39 (1.14 - 1.69)                    | 0.001 *         | 1.31 (1.08 - 1.61) | 0.008 *         |
| Control                                | 1.00                                  |                 | 1.00               |                 |
| History of hypertension                |                                       |                 |                    |                 |
| Non-hypertension ( <i>n</i> = 104,438) |                                       |                 |                    |                 |
| Periodontitis                          | 1.62 (1.41 - 1.86)                    | <0.001 *        | 1.33 (1.16 - 1.53) | <0.001 *        |
| Control                                | 1.00                                  |                 | 1.00               |                 |
| Hypertension ( <i>n</i> = 30,839)      |                                       |                 |                    |                 |
| Periodontitis                          | 1.53 (1.34 - 1.75)                    | <0.001 *        | 1.36 (1.19 - 1.57) | <0.001 *        |
| Control                                | 1.00                                  |                 | 1.00               |                 |
| History of dyslipidemia                |                                       |                 |                    |                 |
| Non-dyslipidemia ( <i>n</i> = 115,588) |                                       |                 |                    |                 |
| Periodontitis                          | 1.57 (1.39 - 1.77)                    | <0.001 *        | 1.32 (1.17 - 1.49) | <0.001 *        |
| Control                                | 1.00                                  |                 | 1.00               |                 |
| Dyslipidemia ( <i>n</i> = 19,689)      |                                       |                 |                    |                 |
| Periodontitis                          | 1.56 (1.32 - 1.84)                    | <0.001 *        | 1.41 (1.19 - 1.68) | <0.001 *        |
| Control                                | 1.00                                  |                 | 1.00               |                 |

\* Logistic regression model, Significance at  $p < 0.05$ . † Adjusted for age, sex, income group, BMI, smoking, alcohol consumption, hypertension, diabetes mellitus, hyperlipidemia histories, and nutritional intake (total calories, protein, fat, and carbohydrate intake).
